# Supplementary material for: Genome-Wide Identification MIKC-Type MADS-Box Gene Family and Their Roles during Development of Floral Buds in Wheel Wingnut (Cyclocarya paliurus)
Source: MDPI journal article supplement (doi:10.3390/ijms221810128), 2021-09-19
Supplement: s1 [file s1]

**Table S2.** Gene list of of the MIKC Group of the *Arabidopsis* MADS-Box Gene Family.

| Gene name | Gene ID        |
|-----------|----------------|
| AGL7      | AT1G69120      |
| AGL8      | AT5G60910      |
| AGL10     | AT1G26310      |
| AP3       | AT3G54340      |
| PI        | AT5G64070      |
| AG        | AT4G18960      |
| AGL1      | AT3G58780      |
| AGL5      | AT2G42830      |
| AG11      | AT4G09960      |
| SEP1      | AT5G15800      |
| SEP2      | AT3G02310      |
| SEP3      | AT1G24260      |
| AGL19     | AT4G22950      |
| AGL14     | AT4G11880      |
| AGL20     | AT2G45660      |
| AGL42     | AT5G62165      |
| AGL71     | AT5G51870      |
| AGL72     | AT5G51860      |
| AGL24     | AT4G24540      |
| SVP       | AT2G22540      |
| AGL6      | AT2G45650      |
| AGL12     | AT1G71692      |
| AGL15     | AT5G13790      |
| AGL17     | AT2G22630      |
| AGL25     | AT5G10140      |
| AGL69     | AT5G65070      |
| AGL68     | AT5G65080      |
| AGL27     | AT1G77080      |
| AGL70     | AT5G65060      |
| AGL31     | AT5G65050      |
| AGL32     | AT5G23260      |
| TM8       | NP_001234105.2 |
| AGL94     | AT1G69540      |
| AGL30     | AT2G03060      |
| AGL65     | AT1G18750      |
| AGL67     | AT1G77950      |
| AGL66     | AT1G77980      |
| AGL104    | AT1G22130      |
