# Supplementary material for: Genome-Wide Identification MIKC-Type MADS-Box Gene Family and Their Roles during Development of Floral Buds in Wheel Wingnut (Cyclocarya paliurus)
Source: MDPI journal article supplement (doi:10.3390/ijms221810128), 2021-09-19
Supplement: s1 [file s1]

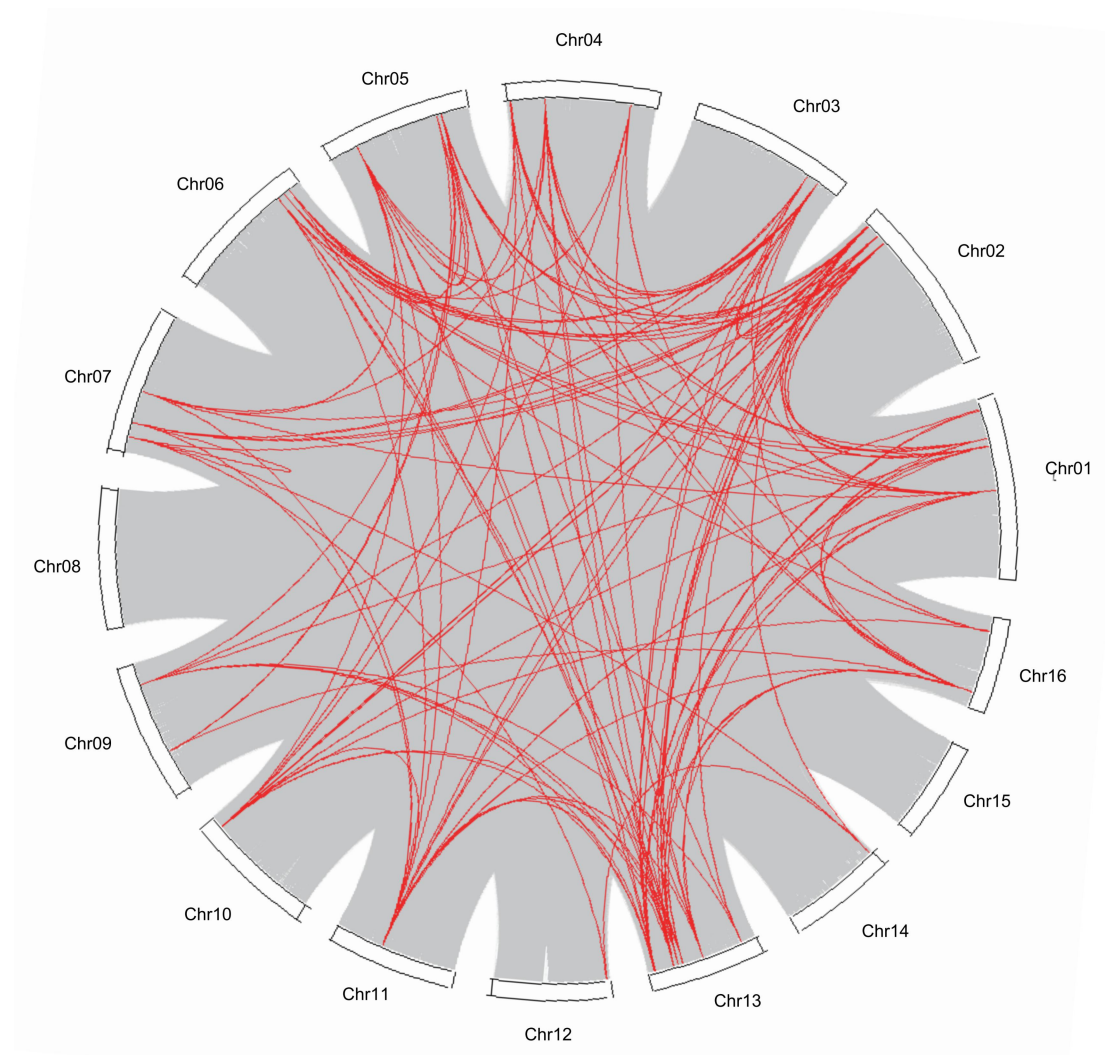

**Figure S1.** Synteny analysis of apple MIKC-type MADS-box genes. Red lines indicate duplicated MIKC-type MADS-box gene pairs. The chromosome number is indicated at the bottom of each chromosome.
