# Supplementary material for: Genome-Wide Identification MIKC-Type MADS-Box Gene Family and Their Roles during Development of Floral Buds in Wheel Wingnut (Cyclocarya paliurus)
Source: MDPI journal article supplement (doi:10.3390/ijms221810128), 2021-09-19
Supplement: s1 [file s1]

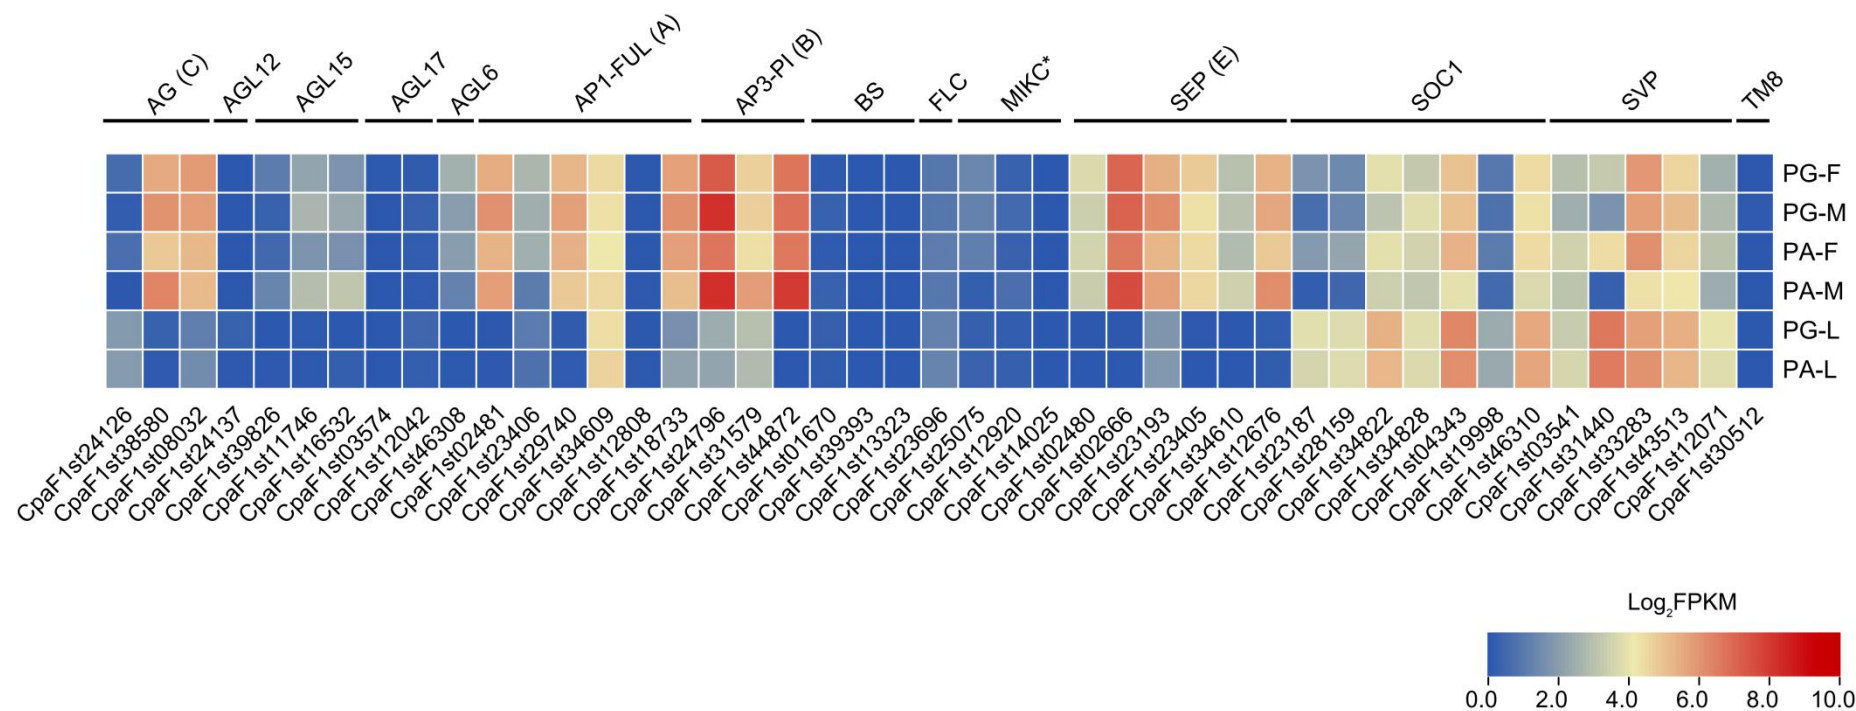

**Figure S2.** Heatmap showing the expression patterns of 45 MIKC-type MADS-box genes among PG and PA floral buds. (PG-F) Female, (PA-F) Female, (PG-M) Male, (PA-M) Male flower buds.
