# Supplementary material for: Genome-Wide Identification MIKC-Type MADS-Box Gene Family and Their Roles during Development of Floral Buds in Wheel Wingnut (Cyclocarya paliurus)
Source: MDPI journal article supplement (doi:10.3390/ijms221810128), 2021-09-19
Supplement: s1 [file s1]

**Table S1.** Analysis of segmental duplication events of MADS-box gene pairs in *C. paliurus*.

| <b>Locus1</b> | <b>Chromosome localization</b> | <b>Locus2</b> | <b>Chromosome localization</b> |
|---------------|--------------------------------|---------------|--------------------------------|
| CpaF1st01670  | Chr1:22512748-22522152         | CpaF1st24126  | Chr2:42674312-42685121         |
| CpaF1st01670  | Chr1:22512748-22522152         | CpaF1st25075  | Chr3:8607733-8610986           |
| CpaF1st01670  | Chr1:22512748-22522152         | CpaF1st31440  | Chr5:7130147-7137608           |
| CpaF1st01670  | Chr1:22512748-22522152         | CpaF1st33283  | Chr5:30392209-30399648         |
| CpaF1st01670  | Chr1:22512748-22522152         | CpaF1st38580  | Chr5:30392209-30399648         |
| CpaF1st01670  | Chr1:22512748-22522152         | CpaF1st08032  | Chr11:12616678-12625690        |
| CpaF1st01670  | Chr1:22512748-22522152         | CpaF1st12042  | Chr11:12616678-12625690        |
| CpaF1st01670  | Chr1:22512748-22522152         | CpaF1st13323  | Chr13:14729791-14740772        |
| CpaF1st01670  | Chr1:22512748-22522152         | CpaF1st18733  | Chr13:14729791-14740772        |
| CpaF1st02480  | Chr1:34029459-34037773         | CpaF1st23405  | Chr2:36737147-36746074         |
| CpaF1st02480  | Chr1:34029459-34037773         | CpaF1st23696  | Chr2:39302712-39326595         |
| CpaF1st02480  | Chr1:34029459-34037773         | CpaF1st29740  | Chr4:28769871-28783403         |
| CpaF1st02480  | Chr1:34029459-34037773         | CpaF1st34609  | Chr6:4893230-4907152           |
| CpaF1st02480  | Chr1:34029459-34037773         | CpaF1st04343  | Chr10:3501933-3522124          |
| CpaF1st02480  | Chr1:34029459-34037773         | CpaF1st12808  | Chr13:8140813-8160527          |
| CpaF1st02480  | Chr1:34029459-34037773         | CpaF1st18733  | Chr16:3824143-3832006          |
| CpaF1st02666  | Chr1:36013106-36019785         | CpaF1st23696  | Chr2:39302712-39326595         |
| CpaF1st02666  | Chr1:36013106-36019785         | CpaF1st24137  | Chr2:42770150-42773456         |
| CpaF1st02666  | Chr1:36013106-36019785         | CpaF1st30512  | Chr4:37577074-37585817         |
| CpaF1st02666  | Chr1:36013106-36019785         | CpaF1st12676  | Chr13:6960414-6973803          |
| CpaF1st02666  | Chr1:36013106-36019785         | CpaF1st12808  | Chr13:8140813-8160527          |
| CpaF1st02666  | Chr1:36013106-36019785         | CpaF1st18733  | Chr16:3824143-3832006          |
| CpaF1st02666  | Chr1:36013106-36019785         | CpaF1st46308  | tig00001919:5147437-5153312    |
| CpaF1st03541  | Chr1:43429845-43432936         | CpaF1st12071  | Chr13:1904102-1910372          |
| CpaF1st03574  | Chr1:43721431-43725962         | CpaF1st43513  | Chr9:5780448-5787523           |
| CpaF1st03574  | Chr1:43721431-43725962         | CpaF1st12042  | Chr13:1686053-1691438          |
| CpaF1st04343  | Chr10:3501933-3522124          | CpaF1st23405  | Chr2:36737147-36746074         |
| CpaF1st04343  | Chr10:3501933-3522124          | CpaF1st24126  | Chr2:42674312-42685121         |
| CpaF1st04343  | Chr10:3501933-3522124          | CpaF1st24137  | Chr2:42770150-42773456         |
| CpaF1st04343  | Chr10:3501933-3522124          | CpaF1st28159  | Chr4:6573859-6580422           |
| CpaF1st04343  | Chr10:3501933-3522124          | CpaF1st29740  | Chr4:28769871-28783403         |
| CpaF1st04343  | Chr10:3501933-3522124          | CpaF1st33283  | Chr5:30392209-30399648         |
| CpaF1st04343  | Chr10:3501933-3522124          | CpaF1st08032  | Chr11:12616678-12625690        |
| CpaF1st04343  | Chr10:3501933-3522124          | CpaF1st12042  | Chr13:1686053-1691438          |
| CpaF1st04343  | Chr10:3501933-3522124          | CpaF1st12808  | Chr13:8140813-8160527          |
| CpaF1st04343  | Chr10:3501933-3522124          | CpaF1st19998  | Chr16:19997527-20003350        |
| CpaF1st04343  | Chr10:3501933-3522124          | CpaF1st46308  | tig00001919:5147437-5153312    |
| CpaF1st08032  | Chr11:12616678-12625690        | CpaF1st23405  | Chr2:36737147-36746074         |
| CpaF1st08032  | Chr11:12616678-12625690        | CpaF1st24126  | Chr2:42674312-42685121         |
| CpaF1st08032  | Chr11:12616678-12625690        | CpaF1st24796  | Chr3:5479964-5482602           |
| CpaF1st08032  | Chr11:12616678-12625690        | CpaF1st30512  | Chr4:37577074-37585817         |
| CpaF1st08032  | Chr11:12616678-12625690        | CpaF1st33283  | Chr5:30392209-30399648         |

|              |                         |              |                             |
|--------------|-------------------------|--------------|-----------------------------|
| CpaF1st08032 | Chr11:12616678-12625690 | CpaF1st34822 | Chr6:6894591-6915492        |
| CpaF1st08032 | Chr11:12616678-12625690 | CpaF1st38580 | Chr7:21011822-21022154      |
| CpaF1st08032 | Chr11:12616678-12625690 | CpaF1st39393 | Chr7:29269125-29273783      |
| CpaF1st08032 | Chr11:12616678-12625690 | CpaF1st12042 | Chr13:1686053-1691438       |
| CpaF1st08032 | Chr11:12616678-12625690 | CpaF1st12920 | Chr13:9350856-9357523       |
| CpaF1st08032 | Chr11:12616678-12625690 | CpaF1st13323 | Chr13:14729791-14740772     |
| CpaF1st08032 | Chr11:12616678-12625690 | CpaF1st18733 | Chr16:3824143-3832006       |
| CpaF1st11746 | Chr12:29355993-29360302 | CpaF1st39826 | Chr7:33119145-33121865      |
| CpaF1st12042 | Chr13:1686053-1691438   | CpaF1st24137 | Chr2:42770150-42773456      |
| CpaF1st12042 | Chr13:1686053-1691438   | CpaF1st24796 | Chr3:5479964-5482602        |
| CpaF1st12042 | Chr13:1686053-1691438   | CpaF1st25075 | Chr3:8607733-8610986        |
| CpaF1st12071 | Chr13:1904102-1910372   | CpaF1st31440 | Chr5:7130147-7137608        |
| CpaF1st12071 | Chr13:1904102-1910372   | CpaF1st33283 | Chr5:30392209-30399648      |
| CpaF1st12071 | Chr13:1904102-1910372   | CpaF1st43513 | Chr9:5780448-5787523        |
| CpaF1st12676 | Chr13:1904102-1910372   | CpaF1st23696 | Chr2:39302712-39326595      |
| CpaF1st12676 | Chr13:1904102-1910372   | CpaF1st30512 | Chr4:37577074-37585817      |
| CpaF1st12676 | Chr13:1904102-1910372   | CpaF1st33283 | Chr5:30392209-30399648      |
| CpaF1st12676 | Chr13:1904102-1910372   | CpaF1st43513 | Chr9:5780448-5787523        |
| CpaF1st12676 | Chr13:1904102-1910372   | CpaF1st12808 | Chr13:8140813-8160527       |
| CpaF1st12808 | Chr13:8140813-8160527   | CpaF1st23405 | Chr2:36737147-36746074      |
| CpaF1st12808 | Chr13:8140813-8160527   | CpaF1st23696 | Chr2:39302712-39326595      |
| CpaF1st12808 | Chr13:8140813-8160527   | CpaF1st29740 | Chr4:28769871-28783403      |
| CpaF1st12808 | Chr13:8140813-8160527   | CpaF1st18733 | Chr16:3824143-3832006       |
| CpaF1st12808 | Chr13:8140813-8160527   | CpaF1st46308 | tig00001919:5147437-5153312 |
| CpaF1st12920 | Chr13:9350856-9357523   | CpaF1st24137 | Chr2:42770150-42773456      |
| CpaF1st12920 | Chr13:9350856-9357523   | CpaF1st34822 | Chr6:6894591-6915492        |
| CpaF1st12920 | Chr13:9350856-9357523   | CpaF1st43513 | Chr9:5780448-5787523        |
| CpaF1st12920 | Chr13:9350856-9357523   | CpaF1st18733 | Chr16:3824143-3832006       |
| CpaF1st13323 | Chr13:14729791-14740772 | CpaF1st28159 | Chr4:6573859-6580422        |
| CpaF1st13323 | Chr13:14729791-14740772 | CpaF1st29740 | Chr4:28769871-28783403      |
| CpaF1st13323 | Chr13:14729791-14740772 | CpaF1st34822 | Chr6:6894591-6915492        |
| CpaF1st13323 | Chr13:14729791-14740772 | CpaF1st18733 | Chr16:3824143-3832006       |
| CpaF1st13323 | Chr13:14729791-14740772 | CpaF1st46308 | tig00001919:5147437-5153312 |
| CpaF1st14025 | Chr13:25286688-25289400 | CpaF1st24137 | Chr2:42770150-42773456      |
| CpaF1st14025 | Chr13:25286688-25289400 | CpaF1st31579 | Chr5:8498499-8507170        |
| CpaF1st14025 | Chr13:25286688-25289400 | CpaF1st43513 | Chr9:5780448-5787523        |
| CpaF1st18733 | Chr16:3824143-3832006   | CpaF1st24796 | Chr3:5479964-5482602        |
| CpaF1st18733 | Chr16:3824143-3832006   | CpaF1st29740 | Chr4:28769871-28783403      |
| CpaF1st18733 | Chr16:3824143-3832006   | CpaF1st30512 | Chr4:37577074-37585817      |
| CpaF1st18733 | Chr16:3824143-3832006   | CpaF1st44872 | Chr9:24368385-24370857      |
| CpaF1st19998 | Chr16:3824143-3832006   | CpaF1st28159 | Chr4:6573859-6580422        |
| CpaF1st19998 | Chr16:3824143-3832006   | CpaF1st34822 | Chr6:6894591-6915492        |
| CpaF1st19998 | Chr16:3824143-3832006   | CpaF1st46308 | tig00001919:5147437-5153312 |
| CpaF1st23405 | Chr2:36737147-36746074  | CpaF1st24796 | Chr3:5479964-5482602        |

|              |                        |              |                             |
|--------------|------------------------|--------------|-----------------------------|
| CpaF1st23405 | Chr2:36737147-36746074 | CpaF1st31440 | Chr5:7130147-7137608        |
| CpaF1st23405 | Chr2:36737147-36746074 | CpaF1st34609 | Chr6:4893230-4907152        |
| CpaF1st23405 | Chr2:36737147-36746074 | CpaF1st39393 | Chr7:29269125-29273783      |
| CpaF1st23696 | Chr2:39302712-39326595 | CpaF1st24137 | Chr2:42770150-42773456      |
| CpaF1st23696 | Chr2:39302712-39326595 | CpaF1st24796 | Chr3:5479964-5482602        |
| CpaF1st23696 | Chr2:39302712-39326595 | CpaF1st30512 | Chr4:37577074-37585817      |
| CpaF1st24126 | Chr2:42674312-42685121 | CpaF1st31440 | Chr5:7130147-7137608        |
| CpaF1st24126 | Chr2:42674312-42685121 | CpaF1st33283 | Chr5:30392209-30399648      |
| CpaF1st24126 | Chr2:42674312-42685121 | CpaF1st38580 | Chr7:21011822-21022154      |
| CpaF1st24126 | Chr2:42674312-42685121 | CpaF1st46308 | tig00001919:5147437-5153312 |
| CpaF1st24137 | Chr2:42674312-42685121 | CpaF1st31440 | Chr5:7130147-7137608        |
| CpaF1st24137 | Chr2:42674312-42685121 | CpaF1st34609 | Chr6:4893230-4907152        |
| CpaF1st24137 | Chr2:42674312-42685121 | CpaF1st34822 | Chr6:6894591-6915492        |
| CpaF1st24137 | Chr2:42674312-42685121 | CpaF1st39393 | Chr7:29269125-29273783      |
| CpaF1st24137 | Chr2:42674312-42685121 | CpaF1st39826 | Chr7:33119145-33121865      |
| CpaF1st24137 | Chr2:42674312-42685121 | CpaF1st43513 | Chr9:5780448-5787523        |
| CpaF1st24137 | Chr2:42674312-42685121 | CpaF1st46308 | tig00001919:5147437-5153312 |
| CpaF1st24796 | Chr3:5479964-5482602   | CpaF1st25075 | Chr3:8607733-8610986        |
| CpaF1st24796 | Chr3:5479964-5482602   | CpaF1st29740 | Chr4:28769871-28783403      |
| CpaF1st24796 | Chr3:5479964-5482602   | CpaF1st30512 | Chr4:37577074-37585817      |
| CpaF1st24796 | Chr3:5479964-5482602   | CpaF1st31440 | Chr5:7130147-7137608        |
| CpaF1st24796 | Chr3:5479964-5482602   | CpaF1st34609 | Chr6:4893230-4907152        |
| CpaF1st24796 | Chr3:5479964-5482602   | CpaF1st34822 | Chr6:6894591-6915492        |
| CpaF1st24796 | Chr3:5479964-5482602   | CpaF1st39393 | Chr7:29269125-29273783      |
| CpaF1st25075 | Chr3:8607733-8610986   | CpaF1st29740 | Chr4:28769871-28783403      |
| CpaF1st25075 | Chr3:8607733-8610986   | CpaF1st39393 | Chr7:29269125-29273783      |
| CpaF1st28159 | Chr4:6573859-6580422   | CpaF1st46308 | tig00001919:5147437-5153312 |
| CpaF1st29740 | Chr4:28769871-28783403 | CpaF1st33283 | Chr5:30392209-30399648      |
| CpaF1st29740 | Chr4:28769871-28783403 | CpaF1st38580 | Chr7:21011822-21022154      |
| CpaF1st31440 | Chr4:28769871-28783403 | CpaF1st33283 | Chr5:30392209-30399648      |
| CpaF1st31440 | Chr4:28769871-28783403 | CpaF1st34609 | Chr6:4893230-4907152        |
| CpaF1st31440 | Chr4:28769871-28783403 | CpaF1st43513 | Chr9:5780448-5787523        |
| CpaF1st31440 | Chr4:28769871-28783403 | CpaF1st44872 | Chr9:24368385-24370857      |
| CpaF1st31440 | Chr4:28769871-28783403 | CpaF1st46308 | tig00001919:5147437-5153312 |
| CpaF1st31579 | Chr4:28769871-28783403 | CpaF1st33283 | Chr5:30392209-30399648      |
| CpaF1st31579 | Chr4:28769871-28783403 | CpaF1st44872 | Chr9:24368385-24370857      |
| CpaF1st33283 | Chr5:30392209-30399648 | CpaF1st38580 | Chr7:21011822-21022154      |
| CpaF1st34822 | Chr6:6894591-6915492   | CpaF1st46308 | tig00001919:5147437-5153312 |
| CpaF1st34828 | Chr6:6894591-6915492   | CpaF1st46310 | tig00001919:5164160-5180657 |
| CpaF1st39393 | Chr7:29269125-29273783 | CpaF1st39826 | Chr7:33119145-33121865      |
| CpaF1st43513 | Chr9:5780448-5787523   | CpaF1st46308 | tig00001919:5147437-5153312 |
