# Supplementary material for: Genome-Wide Identification MIKC-Type MADS-Box Gene Family and Their Roles during Development of Floral Buds in Wheel Wingnut (Cyclocarya paliurus)
Source: Int J Mol Sci. 2021 Sep 19;22(18):10128. doi: 10.3390/ijms221810128 (PMC8471257; doi:10.3390/ijms221810128)
Supplement: Supplementary file 1 [file ijms-22-10128-s001.zip]

Archive with 4 entries (4 files):
- Supplemental Fig. S1.pdf
- Supplemental Fig. S2.pdf
- Supplemental Tab. S1.pdf
- Supplemental Tab. S2.pdf
